# Supplementary material for: Hydrogels assembled from star-shaped polypeptides with a dendrimer as the core
Source: Royal Society of Chemistry journal article supplement (doi:10.1039/c5sm00083a), 2015-01-01
Supplement: c5sm00083a2.pdf [file c5sm00083a2.pdf]

Supporting Information for Manuscript Entitled with  
**Hydrogels assembled from star-shaped polypeptides with  
dendrimer as core**

Yong Shen<sup>a</sup>, Shusheng Zhang<sup>a</sup>, Yaoming Wan<sup>a</sup>, Wenxin Fu<sup>a</sup> and Zhibo Li<sup>a,b,\*</sup>

<sup>a</sup> Beijing National Laboratory for Molecular Sciences (BNLMS), Laboratory of Polymer Physics and Chemistry, Institute of Chemistry, Chinese Academy of Sciences, Beijing 100190, China.

<sup>b</sup> School of Polymer Science and Engineering, Qingdao University of Science and Technology, Qingdao 266042, China.

E-mail: zbli@iccas.ac.cn

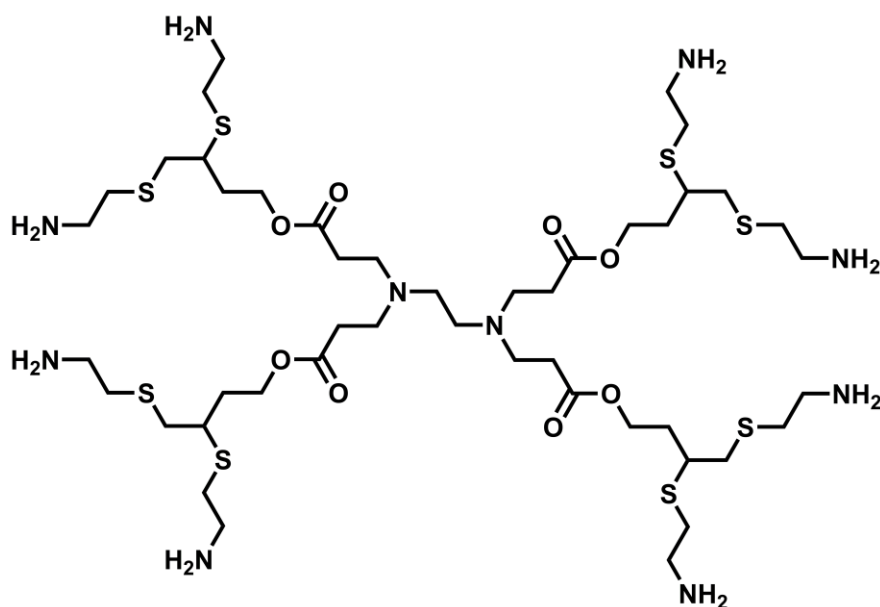

**Scheme S1.** Chemical structure of G2-[NH<sub>2</sub>]<sub>8</sub>.

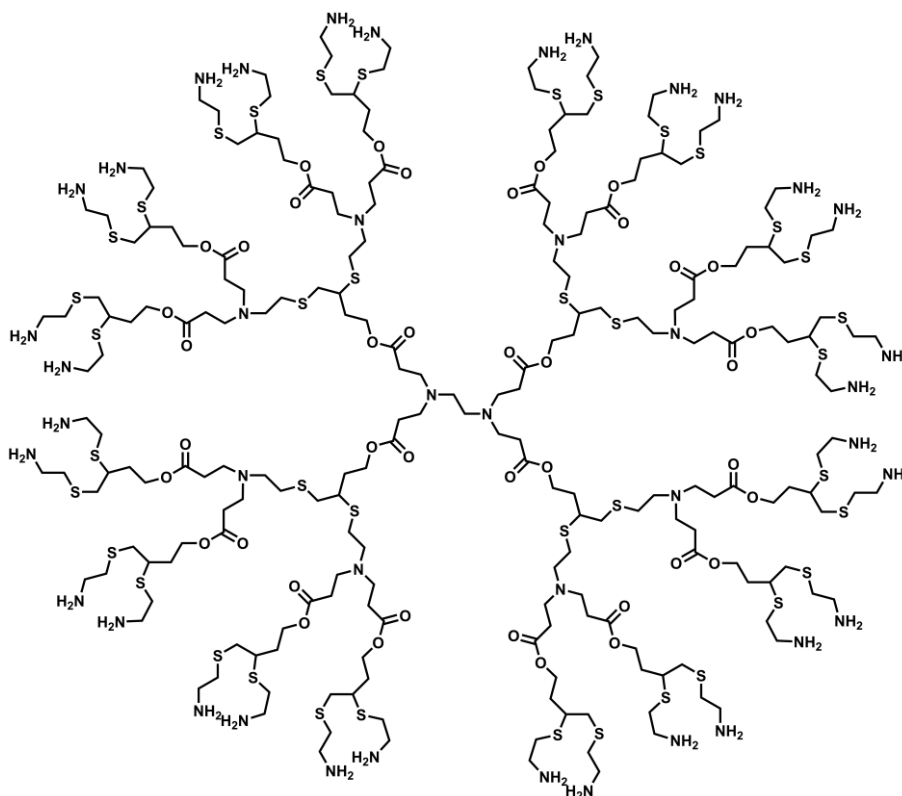

**Scheme S2.** Chemical structure of G4-[NH<sub>2</sub>]<sub>32</sub>.

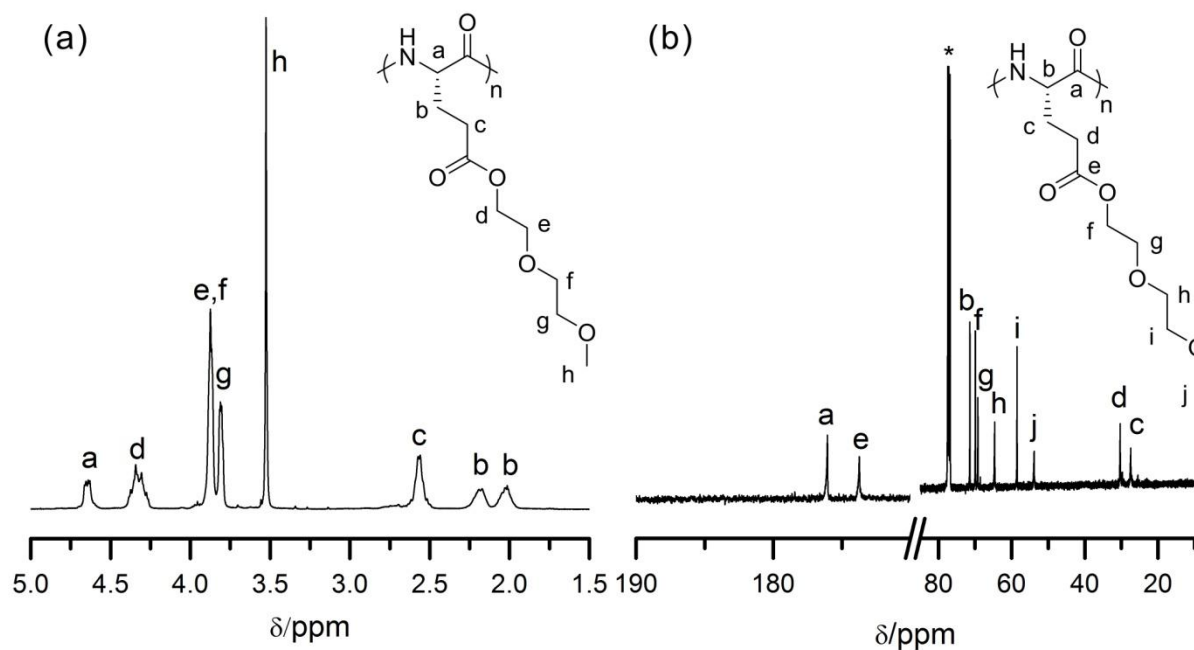

**Figure S1.** (a) <sup>1</sup>H and (b) <sup>13</sup>C NMR spectra of G2-[NH<sub>2</sub>]<sub>8</sub>-(EG<sub>2</sub>Glu)<sub>15</sub>.

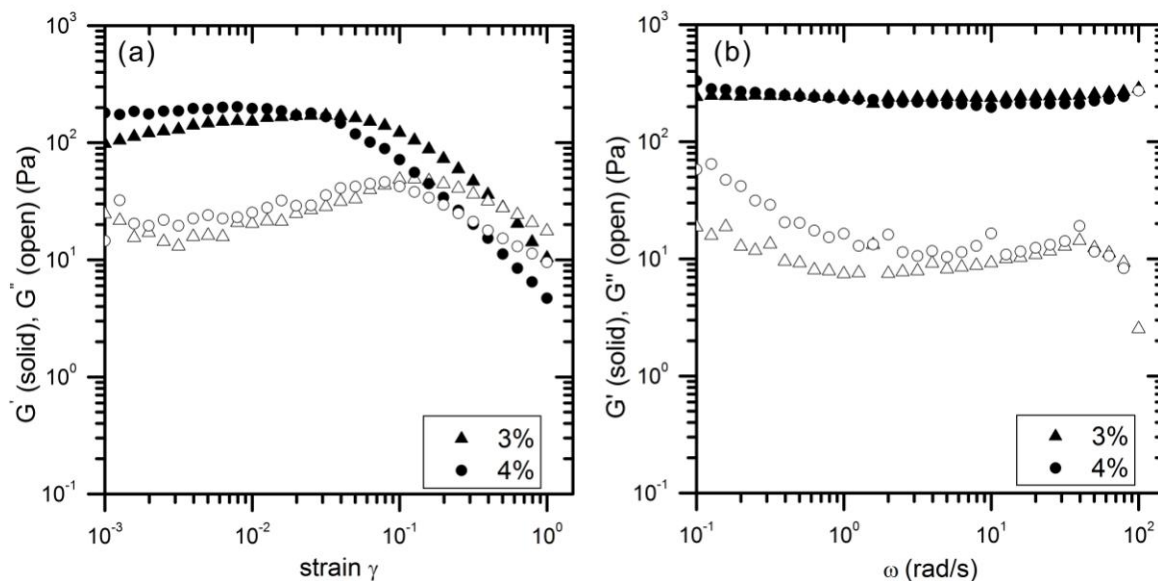

**Figure S2.** (a) Strain sweeps for the G2-[NH<sub>2</sub>]<sub>8</sub>-(EG<sub>2</sub>Glu)<sub>30</sub> aqueous solution at angular frequency  $\omega = 1$  rad/s; (b) Storage modulus  $G'$  (solid symbols) and loss modulus  $G''$  (open symbols) as a function of angular frequency for the same samples ( $\gamma = 0.01$ ) at two different concentrations: (▲) 3.0 wt %, (●) 4.0 wt %.

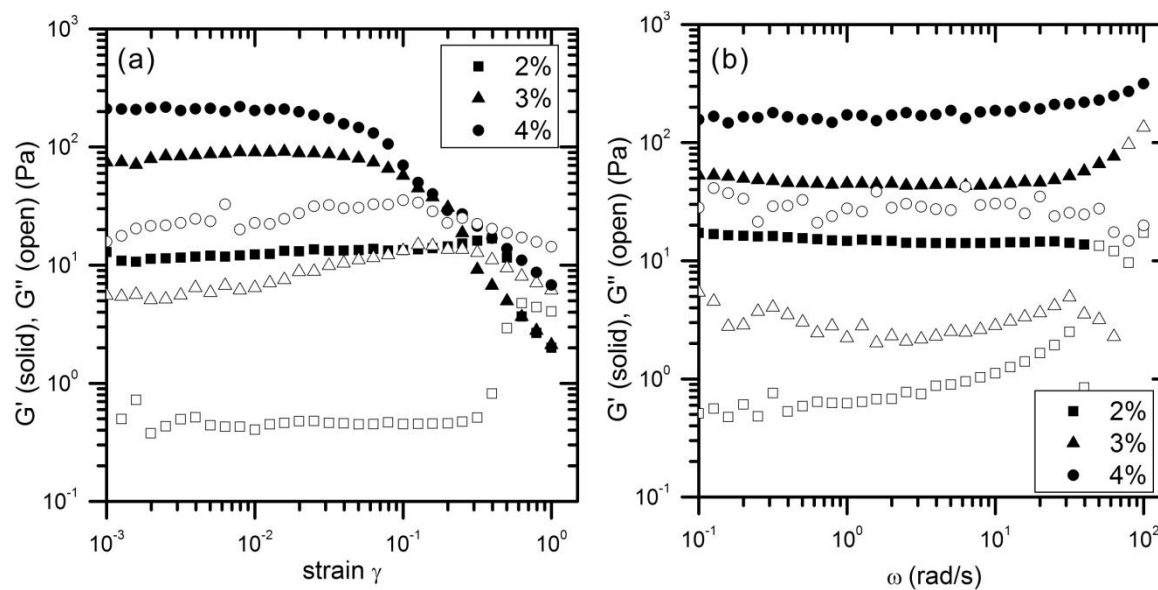

**Figure S3.** (a) Strain sweeps for the G4-[NH<sub>2</sub>]<sub>32</sub>-(EG<sub>2</sub>Glu)<sub>15</sub> aqueous solution at angular frequency  $\omega = 1$  rad/s; (b) Storage modulus  $G'$  (solid symbols) and loss modulus  $G''$  (open symbols) as a function of angular frequency for the same samples ( $\gamma = 0.01$ ) at three different concentrations: (■) 2.0 wt %, (▲) 3.0 wt %, (●) 4.0 wt %.

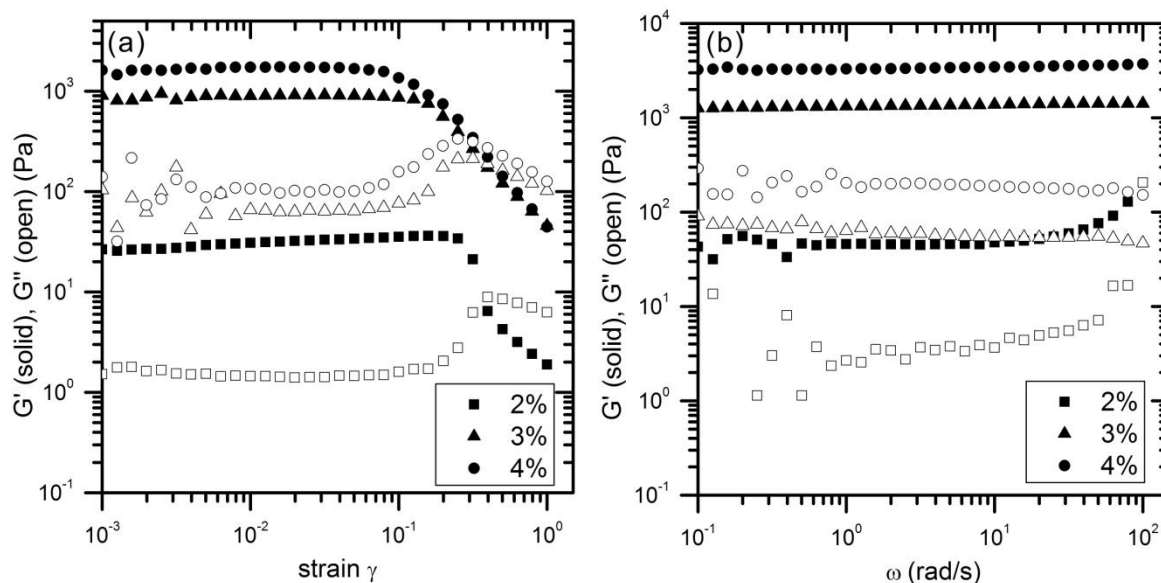

**Figure S4.** (a) Strain sweeps for the G4-[NH<sub>2</sub>]<sub>32</sub>-(EG<sub>2</sub>Glu)<sub>30</sub> aqueous solution at angular frequency  $\omega = 1$  rad/s; (b) Storage modulus  $G'$  (solid symbols) and loss modulus  $G''$  (open symbols) as a function of angular frequency for the same samples ( $\gamma = 0.01$ ) at three different concentrations: (■) 2.0 wt %, (▲) 3.0 wt %, (●) 4.0 wt %.

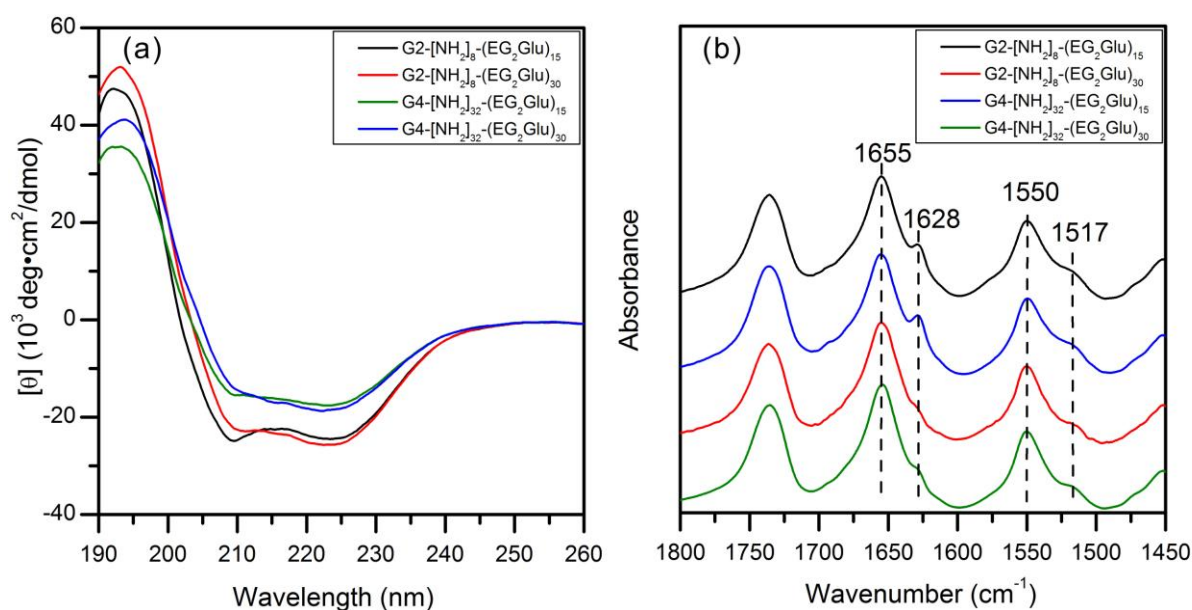

**Figure S5.** Comparison of (a) CD and (b) FT-IR spectra of G2-[NH<sub>2</sub>]<sub>8</sub>-(EG<sub>2</sub>Glu)<sub>n</sub> and G4-[NH<sub>2</sub>]<sub>32</sub>-(EG<sub>2</sub>Glu)<sub>n</sub> ( $n = 15, 30$ ).

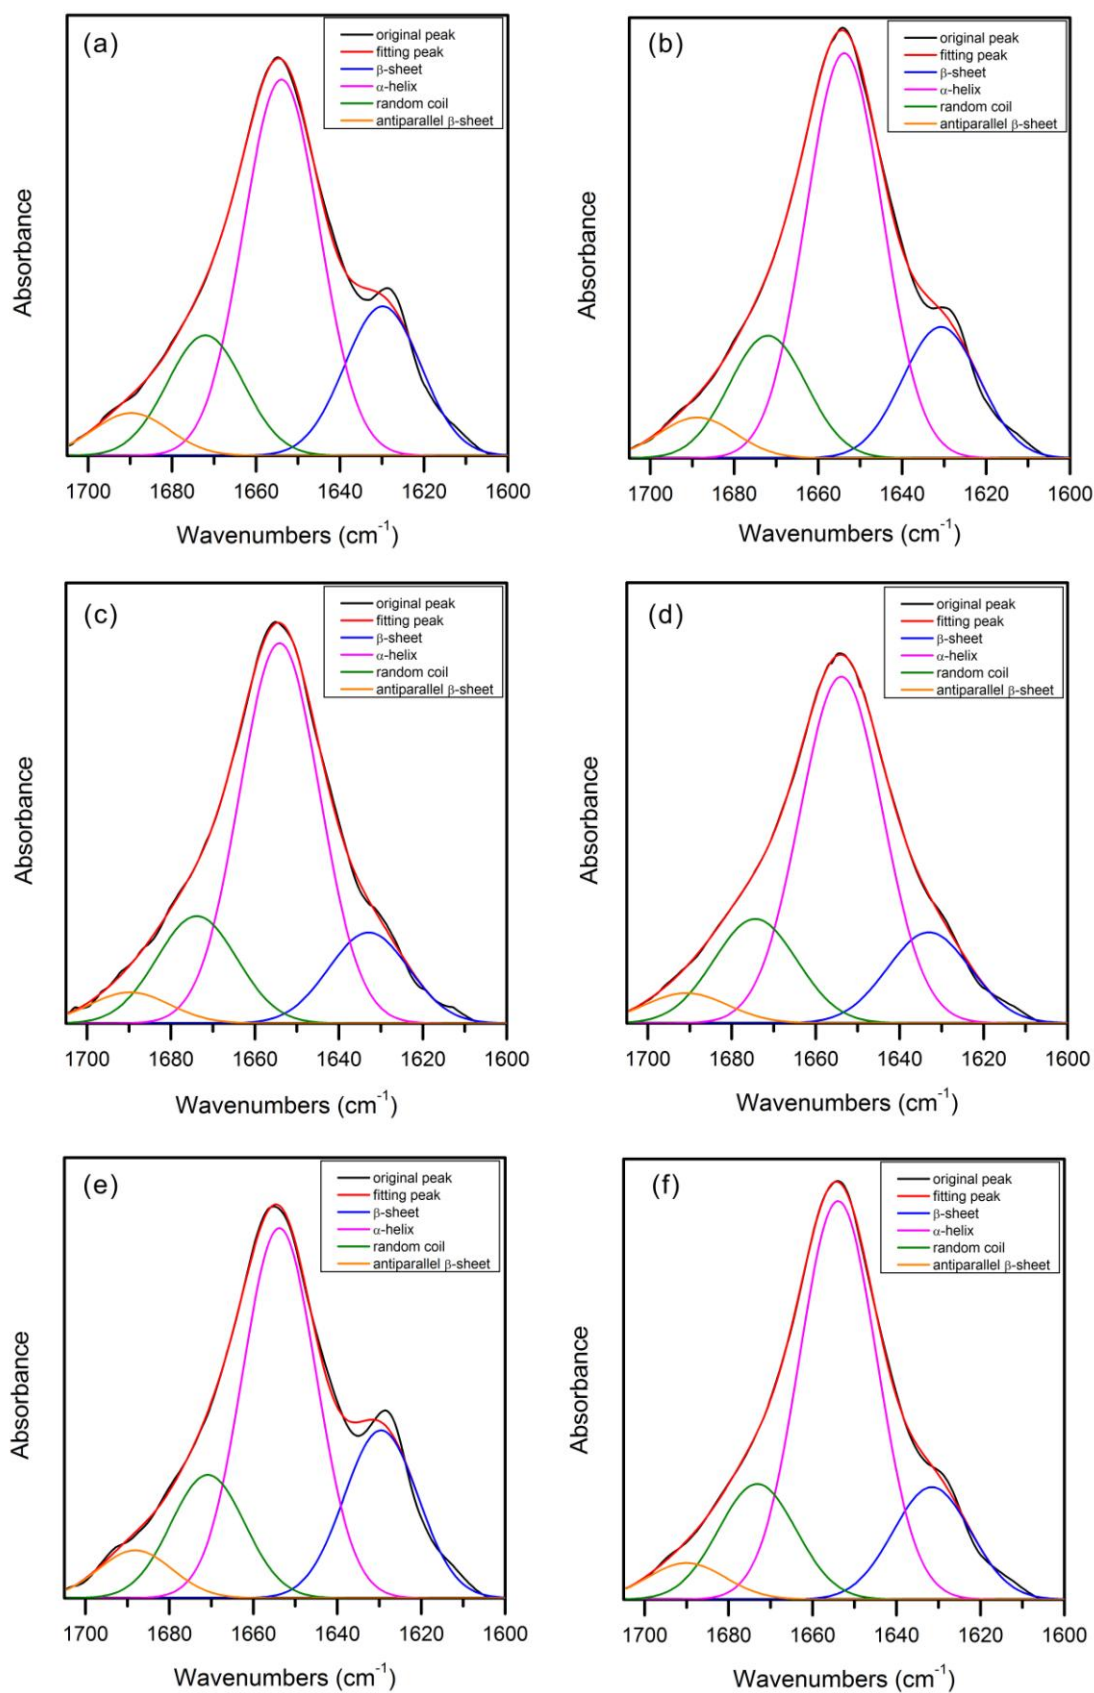

**Figure S6.** Deconvolution of amide I band in FT-IR spectra of G2-[NH<sub>2</sub>]<sub>8</sub>-(EG<sub>2</sub>Glu)<sub>15</sub> (a), G2-[NH<sub>2</sub>]<sub>8</sub>-(EG<sub>2</sub>Glu)<sub>20</sub> (b), G2-[NH<sub>2</sub>]<sub>8</sub>-(EG<sub>2</sub>Glu)<sub>30</sub> (c), G2-[NH<sub>2</sub>]<sub>8</sub>-(EG<sub>2</sub>Glu)<sub>50</sub> (d), G4-[NH<sub>2</sub>]<sub>32</sub>-(EG<sub>2</sub>Glu)<sub>15</sub> (e), and G4-[NH<sub>2</sub>]<sub>32</sub>-(EG<sub>2</sub>Glu)<sub>30</sub> (f).

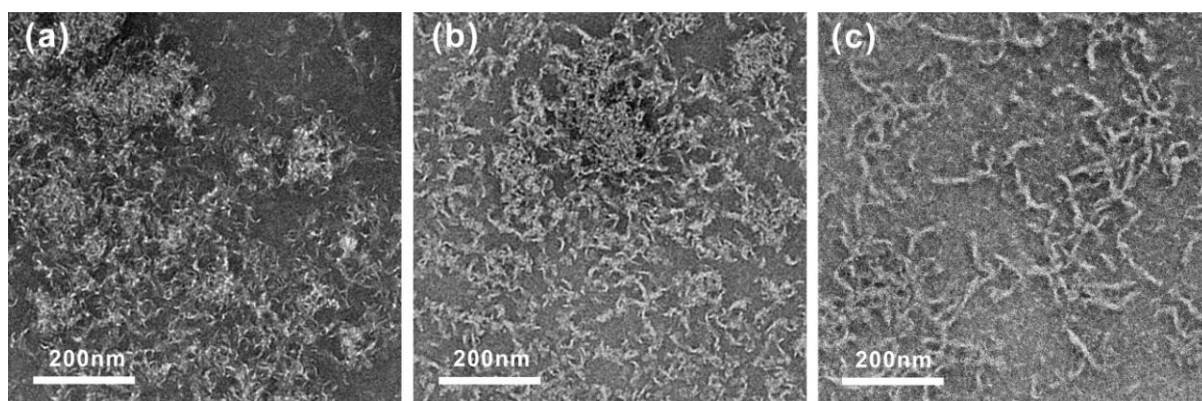

**Figure S7.** TEM images of G2-[NH<sub>2</sub>]<sub>8</sub>-(EG<sub>2</sub>Glu)<sub>30</sub> aqueous solutions: (a) 0.03 wt%, (b) 0.3 wt%, (c) 3 wt%.

**Table S1.** The secondary structure contents calculated by deconvolution of amide I band in FT-IR spectra.

| Sample                                                                   | $\alpha$ -helix | $\beta$ -sheet | Antiparallel<br>$\beta$ -sheet | Random coil |
|--------------------------------------------------------------------------|-----------------|----------------|--------------------------------|-------------|
| G2-[NH <sub>2</sub> ] <sub>8</sub> -(EG <sub>2</sub> Glu) <sub>15</sub>  | 54.6%           | 21.7%          | 6.2%                           | 17.5%       |
| G2-[NH <sub>2</sub> ] <sub>8</sub> -(EG <sub>2</sub> Glu) <sub>20</sub>  | 57.9%           | 18.8%          | 5.8%                           | 17.5%       |
| G2-[NH <sub>2</sub> ] <sub>8</sub> -(EG <sub>2</sub> Glu) <sub>30</sub>  | 62.4%           | 14.9%          | 5.1%                           | 17.6%       |
| G2-[NH <sub>2</sub> ] <sub>8</sub> -(EG <sub>2</sub> Glu) <sub>50</sub>  | 60.6%           | 15.9%          | 5.3%                           | 18.2%       |
| G4-[NH <sub>2</sub> ] <sub>32</sub> -(EG <sub>2</sub> Glu) <sub>15</sub> | 52.1%           | 23.7%          | 6.7%                           | 17.4%       |
| G4-[NH <sub>2</sub> ] <sub>32</sub> -(EG <sub>2</sub> Glu) <sub>30</sub> | 60.1%           | 17.0%          | 5.5%                           | 17.4%       |
